# Supplementary material
Source: PubMed Central journal article supplement (PMC7017733)
Supplement: ajcr0010-0237-f7.pdf [file ajcr0010-0237-f7.pdf]

## NEAT1 stabilizes ELF3 mRNA

| Gene        | Fold enrichment | p value  |
|-------------|-----------------|----------|
| <b>ELF3</b> | 20.413          | 1.05E-09 |
| UBE2T       | 15.123          | 1.73E-07 |
| PAX8        | 10.672          | 4.23E-05 |
| DLC3        | 9.578           | 3.18E-04 |
| USP9X       | 8.412           | 2.67E-04 |
| NF45        | 6.226           | 1.09E-03 |
| VEGFA       | 4.128           | 8.41E-02 |
| UBE2C       | 4.011           | 4.13E-02 |

**Supplementary Figure 1.** The mRNA pulled down by NEAT1 was subjected to RNA sequencing analysis. ELF3 mRNA was one of the most enriched transcripts.

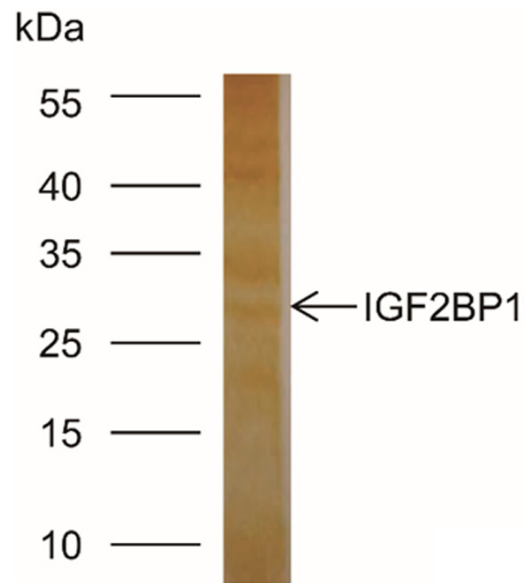

**Supplementary Figure 2.** The RNA pull-down followed by mass spectrometry analysis identified IGF2BP1 as a potential NEAT1-interacting protein.

## NEAT1 stabilizes ELF3 mRNA

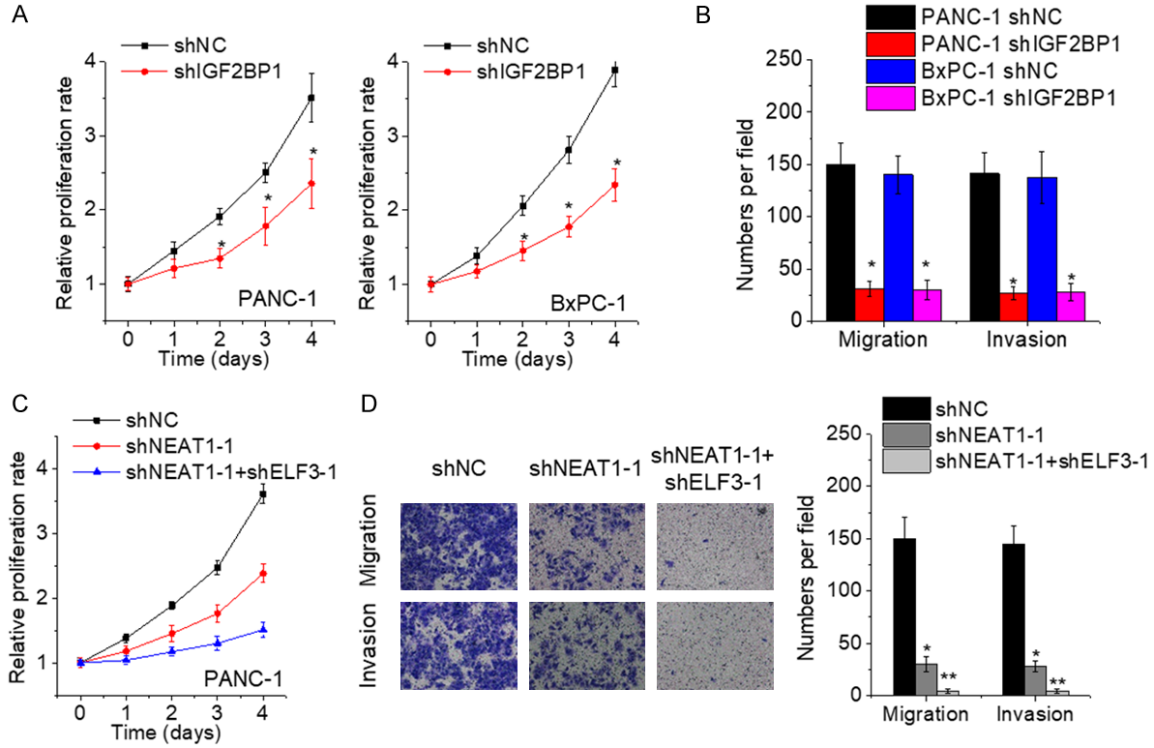

**Supplementary Figure 3.** NEAT1 exerts oncogenic effects partially via ELF3. A. The proliferation of control and IGF2BP1-depleted PANC-1 and BxPC-1 cells was detected by CCK-8 assay. B. The cell migration and invasion of control and IGF2BP1-depleted PANC-1 and BxPC-1 cells was detected by transwell assay. C. Depletion of ELF3 expression strengthened the proliferation inhibition by NEAT1 knockdown in PANC-1 cells. D. Depletion of ELF3 expression strengthened the migration and invasion inhibition by NEAT1 knockdown in PANC-1 cells.
